# Supplementary material for: Expression of lignocellulolytic enzymes in Pichia pastoris
Source: PubMed Central journal article supplement (PMC3503753; doi:10.1186/1475-2859-11-61), 2012-05-14
Supplement: 1475-2859-11-61-S4.pdf [file 1475-2859-11-61-S4.pdf]

## Additional file 4

These tables provide the individual data points of the measured target protein concentration for the Figures 2, 3 and 4. For the explanation of the different abbreviations please refer to the original Figure legends.

Table 1: Measured protein concentrations during fed-batch cultivations of *TrCBH2* variants, optimized by different gene optimization methods; data as represented in Figure 2A.

| Time (h) | P(AOX1)-<br><i>TrCBH2</i> -<br>CP-CN7±1<br>(g/l) | P(De)-<br><i>TrCBH2</i> -<br>CP-CN25±7<br>(g/l) | P(AOX1)-<br><i>TrCBH2</i> -<br>HM-CN3<br>(g/l) | P(De)-<br><i>TrCBH2</i> -<br>HM-CN7±1<br>(g/l) | P(De)-<br><i>TrCBH2</i> -<br>HM-CN1<br>(g/l) | P(GAP)-<br><i>TrCBH2</i> -<br>HM-CN4<br>(g/l) |
|----------|--------------------------------------------------|-------------------------------------------------|------------------------------------------------|------------------------------------------------|----------------------------------------------|-----------------------------------------------|
| 0        | 0                                                | 0,01                                            | 0                                              | 0                                              | 0                                            | 0                                             |
| 18       | 0                                                | 0,22                                            | 0,05                                           | 0,14                                           | 0,01                                         | 0,35                                          |
| 47       | 0,18                                             | 0,73                                            | 0,81                                           | 1,20                                           | 0,05                                         | 1,11                                          |
| 74       | 0,69                                             | 2,42                                            | 1,70                                           | 2,74                                           | 0,35                                         | 1,70                                          |
| 90       | 1,26                                             | 3,81                                            | 2,78                                           | 4,37                                           | 0,43                                         | 2,43                                          |

Table 2: Measured protein concentrations during fed-batch cultivations of *TrCBH2* variants, optimized by different gene optimization methods; and normalized to regarding copy numbers, as represented in Figure 2B.

| Time (h) | P(AOX1)-<br><i>TrCBH2</i> -<br>CP-CN7±1<br>(g/l) | P(De)-<br><i>TrCBH2</i> -<br>CP-CN25±7<br>(g/l) | P(AOX1)-<br><i>TrCBH2</i> -<br>HM-CN3<br>(g/l) | P(De)-<br><i>TrCBH2</i> -<br>HM-CN7±1<br>(g/l) | P(De)-<br><i>TrCBH2</i> -<br>HM-CN1<br>(g/l) | P(GAP)-<br><i>TrCBH2</i> -<br>HM-CN4<br>(g/l) |
|----------|--------------------------------------------------|-------------------------------------------------|------------------------------------------------|------------------------------------------------|----------------------------------------------|-----------------------------------------------|
| 0        | 0                                                | 0                                               | 0                                              | 0                                              | 0                                            | 0                                             |
| 18       | 0                                                | 0,01                                            | 0,02                                           | 0,02                                           | 0,01                                         | 0,09                                          |
| 47       | 0,03                                             | 0,03                                            | 0,27                                           | 0,17                                           | 0,05                                         | 0,28                                          |
| 74       | 0,10                                             | 0,10                                            | 0,57                                           | 0,39                                           | 0,35                                         | 0,42                                          |
| 90       | 0,18                                             | 0,15                                            | 0,93                                           | 0,63                                           | 0,43                                         | 0,61                                          |

Table 3: Measured protein concentrations during fed-batch cultivations of *TrbMan* and *TXynA*; data as represented in Figure 2A.

| Time (h) | P(En)-<br><i>TXynA</i> -HM-<br>CN10±3<br>(g/l) | P(En)-<br><i>TXynA</i> -HM-<br>CN18±4<br>(g/l) | Time (h) | P(En)-<br><i>TXynA</i> -HM-<br>CN6±1<br>(g/l) | Time (h) | P(En)-<br><i>TrbMan</i> -HM-<br>CN1<br>(g/l) |
|----------|------------------------------------------------|------------------------------------------------|----------|-----------------------------------------------|----------|----------------------------------------------|
| 0        | 0                                              | 0                                              | 0        | 0                                             | 0        | 0                                            |
| 13       | 0,20                                           | 0                                              | 21       | 0,26                                          | 20       | 0,05                                         |
| 20       | 0,35                                           | 0,10                                           | 30       | 0,37                                          | 26       | 0,08                                         |
| 40       | 0,40                                           | 0,20                                           | 52       | 0,61                                          | 52       | 0,25                                         |
| 66,5     | 0,60                                           | 0,20                                           | 75,5     | 0,86                                          | 72       | 0,68                                         |
|          |                                                |                                                | 92       | 0,85                                          | 91       | 0,71                                         |

Table 4: Individual data points of the fed- batch cultivation of selected strains; data points at 90 h and the respective copy numbers and expression levels normalized to copy number; data as represented in Figure 3.

| Strain           | <i>TrCBH2</i> <sub>t90</sub> (g/l) | CN | <i>TrCBH2</i> <sub>t90</sub> /CN (g/l) |
|------------------|------------------------------------|----|----------------------------------------|
| P(AOX1)-CP-CN7±1 | 1,26                               | 7  | 0,18                                   |
| P(De)-CP-CN25±7  | 3,81                               | 25 | 0,15                                   |
| P(AOX1)-HM-CN3   | 2,78                               | 3  | 0,93                                   |
| P(De)-HM-CN7±1   | 4,37                               | 7  | 0,63                                   |
| P(De)-HM-CN1     | 0,43                               | 1  | 0,43                                   |
| P(GAP)-HM-CN4    | 2,43                               | 4  | 0,61                                   |

Table 5: Relative ratios of the normalized expression levels at 90 h of the different gene optimization variants (HM/CP) under the control of P(AOX1) and P(De), data as represented in Figure 3B:

| Promoter | <i>HM</i> <sub>t90, norm</sub> (g/l) |      | <i>CP</i> <sub>t90, norm</sub> (g/l) | <i>HM</i> <sub>t90, norm</sub> / <i>CP</i> <sub>t90, norm</sub> |
|----------|--------------------------------------|------|--------------------------------------|-----------------------------------------------------------------|
| P(De)    | 0,63                                 | 0,43 | 0,15                                 | 3,46 ±0,92                                                      |
| P(AOX1)  | 0,93                                 |      | 0,18                                 | 5,14                                                            |

Table 6: Relative ratios of the normalized expression levels at 90 h of the different methanol inducible promoters (P(AOX1)/P(De)) expressing either *TrCBH2*-CP or *TrCBH2*-HM, data as represented in Figure 3C:

| Gene optimization method       | P(AOX1) (g/l) | P(De) (g/l) |      | P(AOX1)/P(De) |
|--------------------------------|---------------|-------------|------|---------------|
| <i>CP</i> <sub>t90, norm</sub> | 0,18          | 0,15        |      | 1,18          |
| <i>HM</i> <sub>t90, norm</sub> | 0,93          | 0,63        | 0,43 | 1,76          |

Table 7: Measured protein concentrations during fed-batch cultivations of *TrCBH2* variants expressed under the control of strong methanol inducible promoters (P(AOX1), P(En)) compared to the weak methanol inducible promoter P(De), data as represented in Figure 4A

| Time (h) | P(AOX1)- <i>TrCBH2</i> -HM-CN5±1 (g/l) | Time (h) | P(En)- <i>TrCBH2</i> -HM-CN6±1 (g/l) | Time (h) | P(De)- <i>TrCBH2</i> -HM-CN7±1 (g/l) |
|----------|----------------------------------------|----------|--------------------------------------|----------|--------------------------------------|
| 0        | 0                                      | 0        | 0,05                                 | 0        | 0                                    |
| 20,5     | 0,34                                   | 19       | 0,31                                 | 18       | 0,14                                 |
| 28,5     | 0,90                                   | 27,5     | 2,08                                 | 47       | 1,20                                 |
| 41,5     | 2,63                                   | 44       | 5,11                                 | 74       | 2,74                                 |
| 55,5     | 4,19                                   | 51,5     | 4,90                                 | 90       | 4,37                                 |
| 70       | 5,00                                   | 67,5     | 6,55                                 |          |                                      |
| 91,5     | 5,98                                   | 90,5     | 5,55                                 |          |                                      |

Table 8: Measured protein concentrations during fed-batch cultivation of a *TrbMan* variant compared to previously obtained results, data as represented in Figure 4B:

| Time (h) | P(De)-<br>TrbMan-<br>HM-CN5±1<br>(g/l) | P(En)-<br>TrbMan-<br>HM-CN1<br>(g/l) |
|----------|----------------------------------------|--------------------------------------|
| 0        | 0                                      | 0                                    |
| 20       | 0,10                                   | 0,05                                 |
| 26       | 0,40                                   | 0,08                                 |
| 52       | 0,60                                   | 0,25                                 |
| 72       | 0,90                                   | 0,68                                 |
| 91       | 1,14                                   | 0,72                                 |
